# Supplementary material for: Fabrication and characterisation of a flexible thermoelectric generator using PANI/graphite/bismuth telluride composites
Source: PubMed Central journal article supplement — RSC Adv. 2024 Dec 23;14(54):40117–32. doi: 10.1039/d4ra04565c (PMC11664334; doi:10.1039/d4ra04565c), 2024-12-23
Supplement: RA-014-D4RA04565C-s001.pdf [file RA-014-D4RA04565C-s001.pdf]

**Table S1: Weight percentage of elements**

| <b>Name of composite</b> | <b>Elements</b> | <b>Weight percentage</b> |
|--------------------------|-----------------|--------------------------|
| P100                     | Carbon          | 65.13                    |
|                          | Nitrogen        | 6.06                     |
|                          | Oxygen          | 27.02                    |
|                          | Sulphur         | 1.8                      |
| P1G1                     | Carbon          | 76.71                    |
|                          | Nitrogen        | 3.6                      |
|                          | Oxygen          | 17.92                    |
|                          | Sulphur         | 1.78                     |
| P1G1B                    | Carbon          | 73.57                    |
|                          | Nitrogen        | 1.55                     |
|                          | Oxygen          | 23.60                    |
|                          | Sulphur         | 0.95                     |
|                          | Bismuth         | 0.12                     |
|                          | Tellurium       | 0.20                     |
| P1G2B                    | Carbon          | 77.23                    |
|                          | Nitrogen        | 0.4                      |
|                          | Oxygen          | 22.06                    |
|                          | Sulphur         | 0.59                     |
|                          | Bismuth         | 0.05                     |
|                          | Tellurium       | 0.06                     |
| P1G3B                    | Carbon          | 81.92                    |
|                          | Nitrogen        | 1.28                     |
|                          | Oxygen          | 15.09                    |
|                          | Sulphur         | 1.35                     |
|                          | Bismuth         | 0.17                     |
|                          | Tellurium       | 0.18                     |

**Table S2: Power generated at 30K**

| <b>Resistance (<math>\Omega</math>)</b> | <b>Voltage (mV)</b> | <b>Current (<math>\mu\text{A}</math>)</b> | <b>Power (pW)</b> |
|-----------------------------------------|---------------------|-------------------------------------------|-------------------|
| 0                                       | 0.03                | 0.03                                      | 0.9               |
| 15000                                   | 0.49                | 0.01                                      | 4.9               |
| 16000                                   | 0.5                 | 0.01                                      | 5                 |
| 17000                                   | 0.52                | 0.01                                      | 5.2               |
| 18000                                   | 0.53                | 0.01                                      | 5.3               |
| 19000                                   | 0.53                | 0.01                                      | 5.3               |
| 20000                                   | 0.56                | 0.01                                      | 5.6               |
| 21000                                   | 0.55                | 0.01                                      | 5.5               |
| 22000                                   | 0.56                | 0.01                                      | 5.6               |
| 23000                                   | 0.57                | 0.01                                      | 5.7               |
| 24000                                   | 0.6                 | 0.01                                      | 6                 |
| 25000                                   | 0.61                | 0.01                                      | 6.1               |

**Table S3: Power generated at 50 K**

| <b>Resistance (<math>\Omega</math>)</b> | <b>Voltage (mV)</b> | <b>Current (<math>\mu\text{A}</math>)</b> | <b>Power (pW)</b> |
|-----------------------------------------|---------------------|-------------------------------------------|-------------------|
| 0                                       | 0.08                | 0.07                                      | 5.6               |
| 15000                                   | 1.06                | 0.04                                      | 42.4              |
| 16000                                   | 1.05                | 0.04                                      | 42                |
| 17000                                   | 1.08                | 0.03                                      | 32.4              |
| 18000                                   | 1.14                | 0.03                                      | 34.2              |
| 19000                                   | 1.17                | 0.03                                      | 35.1              |
| 20000                                   | 1.22                | 0.03                                      | 36.6              |
| 21000                                   | 1.24                | 0.03                                      | 37.1              |
| 22000                                   | 1.24                | 0.03                                      | 37.2              |
| 23000                                   | 1.27                | 0.02                                      | 25.4              |
| 24000                                   | 1.28                | 0.02                                      | 25.6              |
| 25000                                   | 1.31                | 0.02                                      | 26.2              |

**Table S4: Power generated at 70 K**

| <b>Resistance (<math>\Omega</math>)</b> | <b>Voltage (mV)</b> | <b>Current (<math>\mu\text{A}</math>)</b> | <b>Power (pW)</b> |
|-----------------------------------------|---------------------|-------------------------------------------|-------------------|
|-----------------------------------------|---------------------|-------------------------------------------|-------------------|

|       |      |      |      |
|-------|------|------|------|
| 0     | 0.11 | 0.1  | 11   |
| 15000 | 1.26 | 0.05 | 63   |
| 16000 | 1.27 | 0.05 | 63.5 |
| 17000 | 1.29 | 0.05 | 64.5 |
| 18000 | 1.39 | 0.05 | 69.5 |
| 19000 | 1.44 | 0.05 | 72   |
| 20000 | 1.52 | 0.05 | 76   |
| 21000 | 1.68 | 0.05 | 84   |
| 22000 | 1.7  | 0.05 | 85   |
| 23000 | 1.75 | 0.04 | 70   |
| 24000 | 1.78 | 0.04 | 71.2 |
| 25000 | 1.8  | 0.04 | 72   |

**Table S5: Power generated at 100 K**

| <b>Resistance (<math>\Omega</math>)</b> | <b>Voltage (mV)</b> | <b>Current (<math>\mu</math>A)</b> | <b>Power (pW)</b> |
|-----------------------------------------|---------------------|------------------------------------|-------------------|
| 0                                       | 0.17                | 0.16                               | 27.2              |
| 15000                                   | 1.94                | 0.07                               | 135.8             |
| 16000                                   | 1.91                | 0.08                               | 152.8             |
| 17000                                   | 2.3                 | 0.09                               | 207               |
| 18000                                   | 2.34                | 0.09                               | 210.6             |
| 19000                                   | 2.37                | 0.09                               | 213.3             |
| 20000                                   | 2.36                | 0.08                               | 188.8             |
| 21000                                   | 2.39                | 0.08                               | 191.2             |
| 22000                                   | 2.41                | 0.08                               | 192.8             |
| 23000                                   | 2.42                | 0.07                               | 169.4             |
| 24000                                   | 2.42                | 0.07                               | 169.4             |
| 25000                                   | 2.44                | 0.07                               | 170.8             |

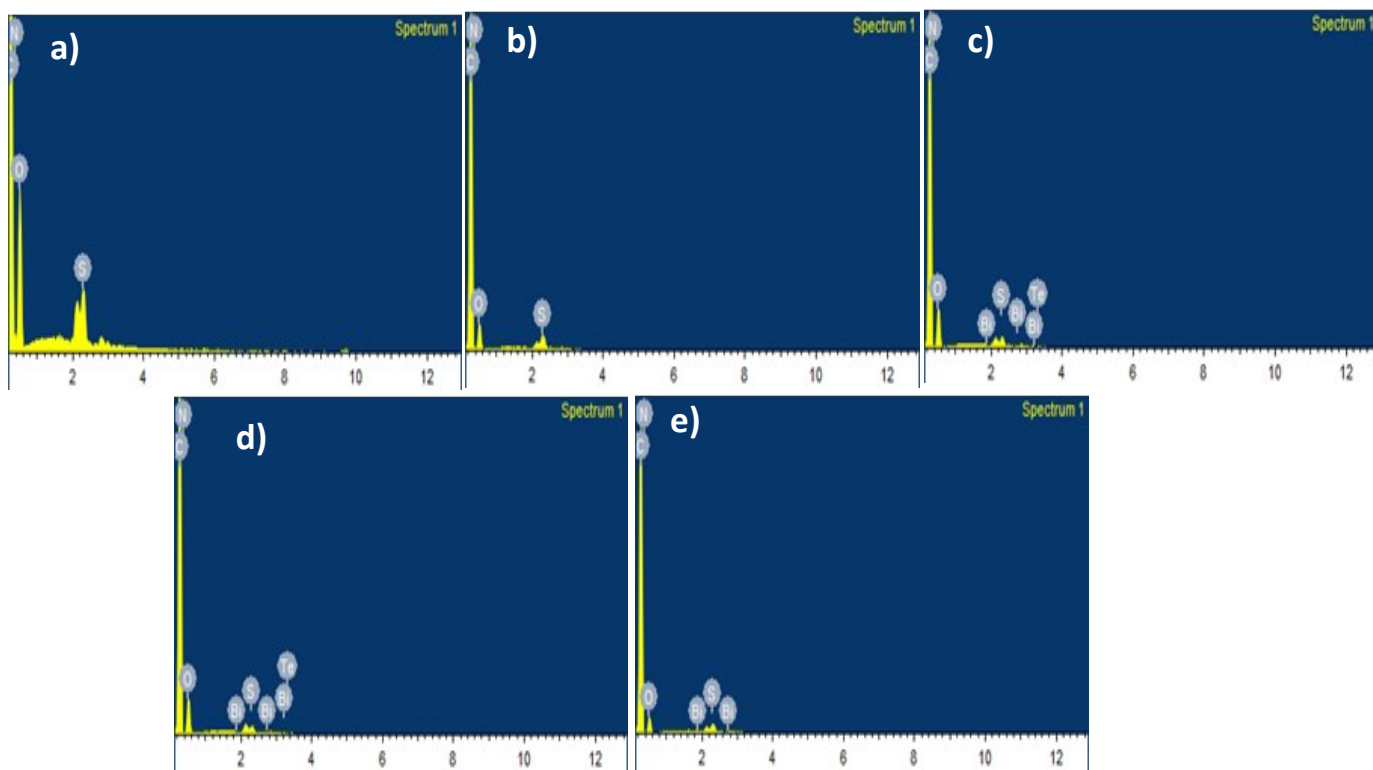

**Figure S1: EDS spectrum of (a) P100, (b)P1G1, (c)P1G1B, (d) P1G2B and (e) P1G3B FTEGs**

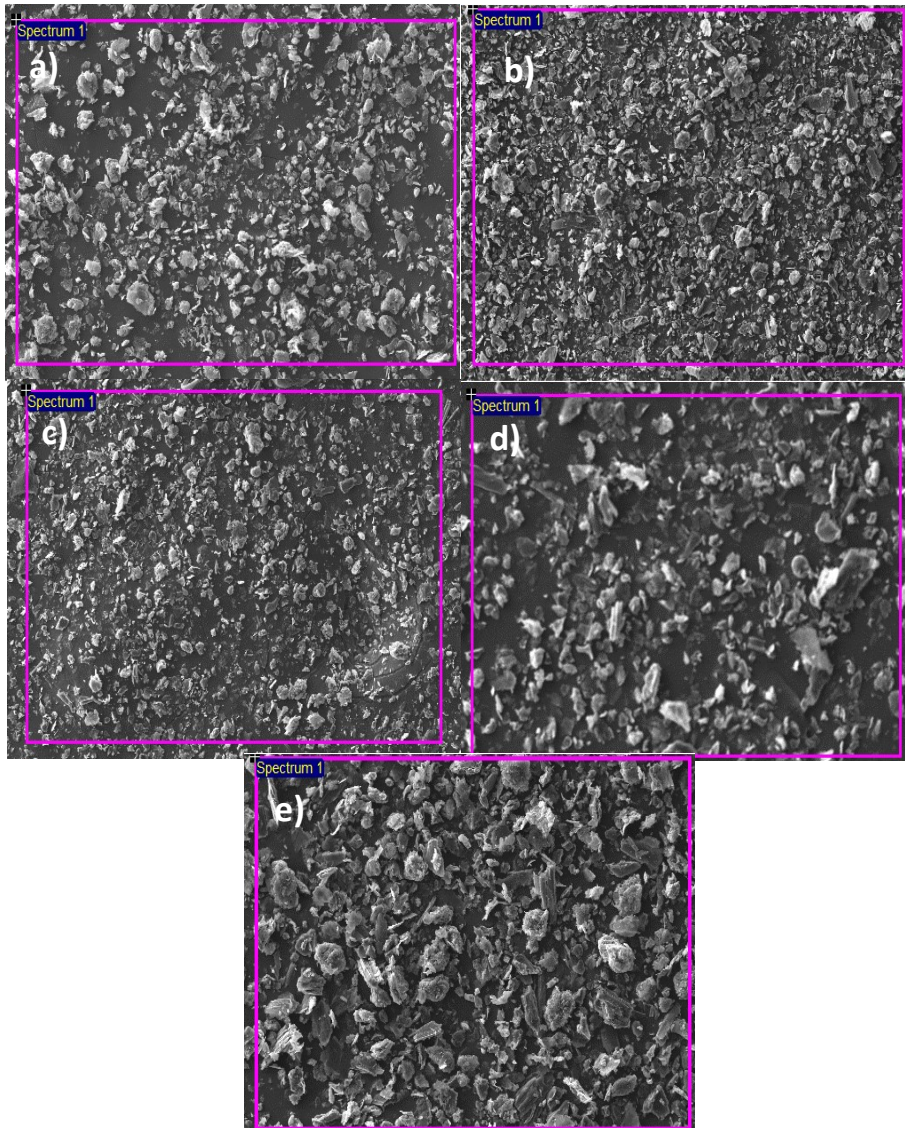

**Figure S2: Corresponding spot positions were EDS spectra are analysed for (a) P100, (b)P1G1, (c)P1G1B, (d) P1G2B and (e) P1G3B FTEGs**

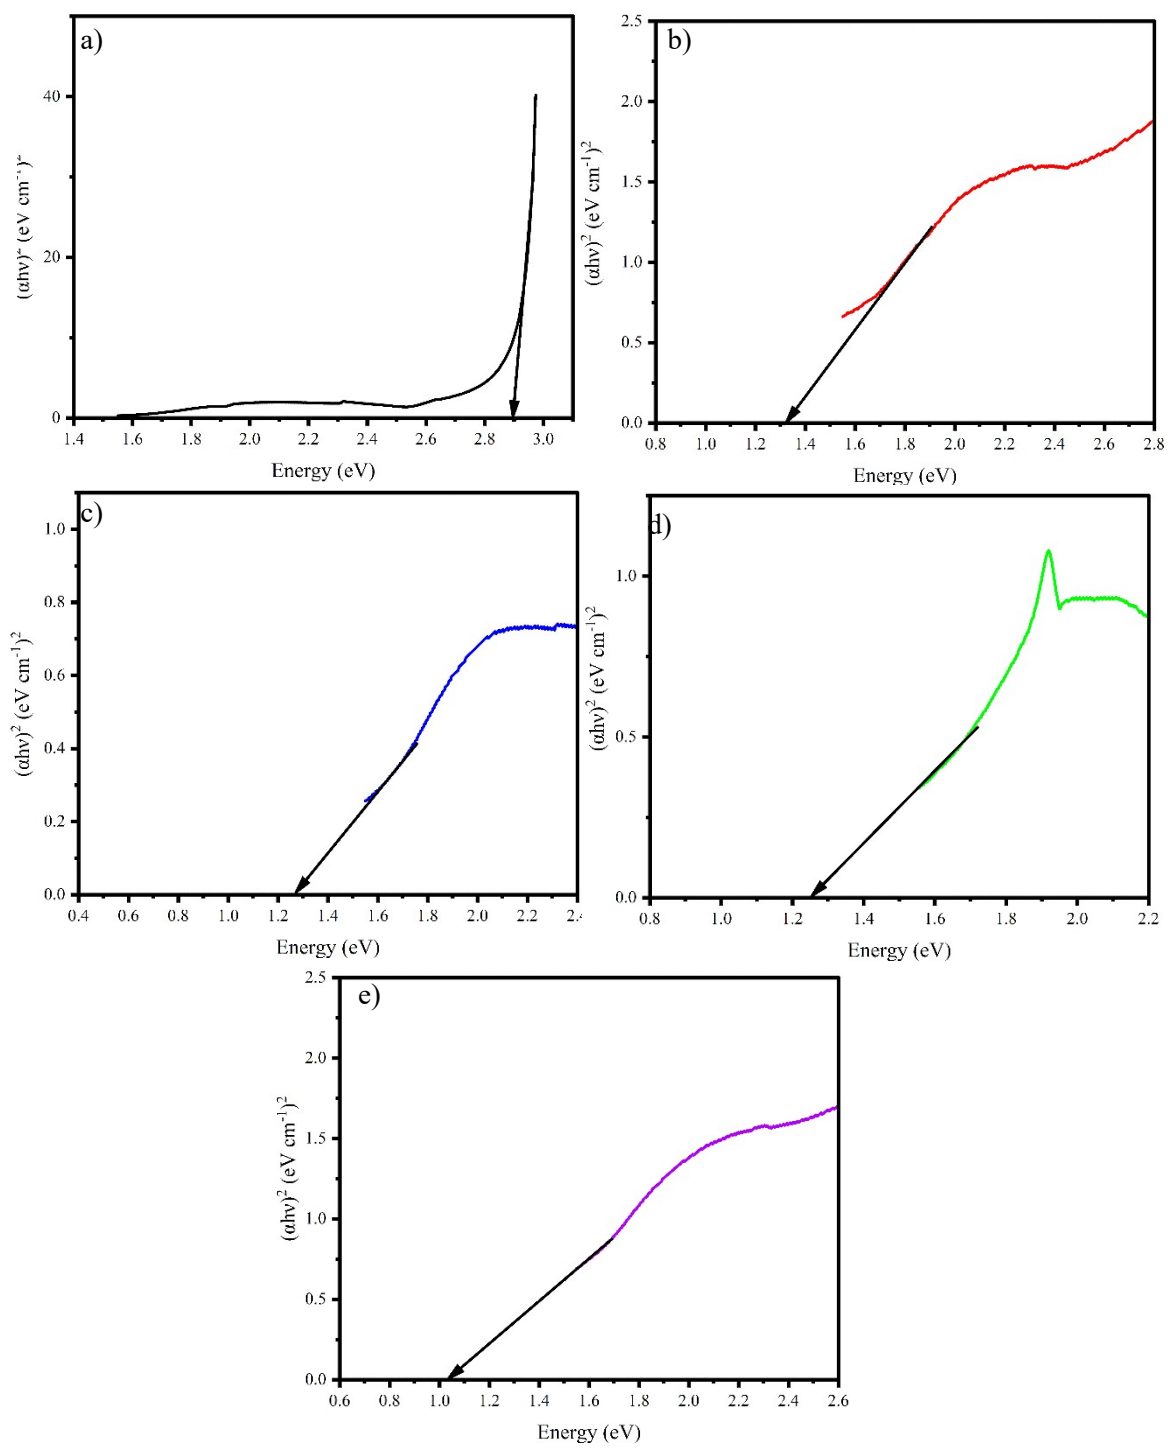

**Figure S3: Tauc's plot of (a)P100, (b) P1G1 (c) P1G1B, (d) P1G2B and (e) P1G3B**
